# Supplementary material for: Sugar transporters in Fabaceae, featuring SUT MST and SWEET families of the model plant Medicago truncatula and the agricultural crop Pisum sativum
Source: PubMed Central journal article supplement (PMC6768477; doi:10.1371/journal.pone.0223173), 2019-09-30
Supplement: pone.0223173.s001.pdf [file pone.0223173.s001.pdf]

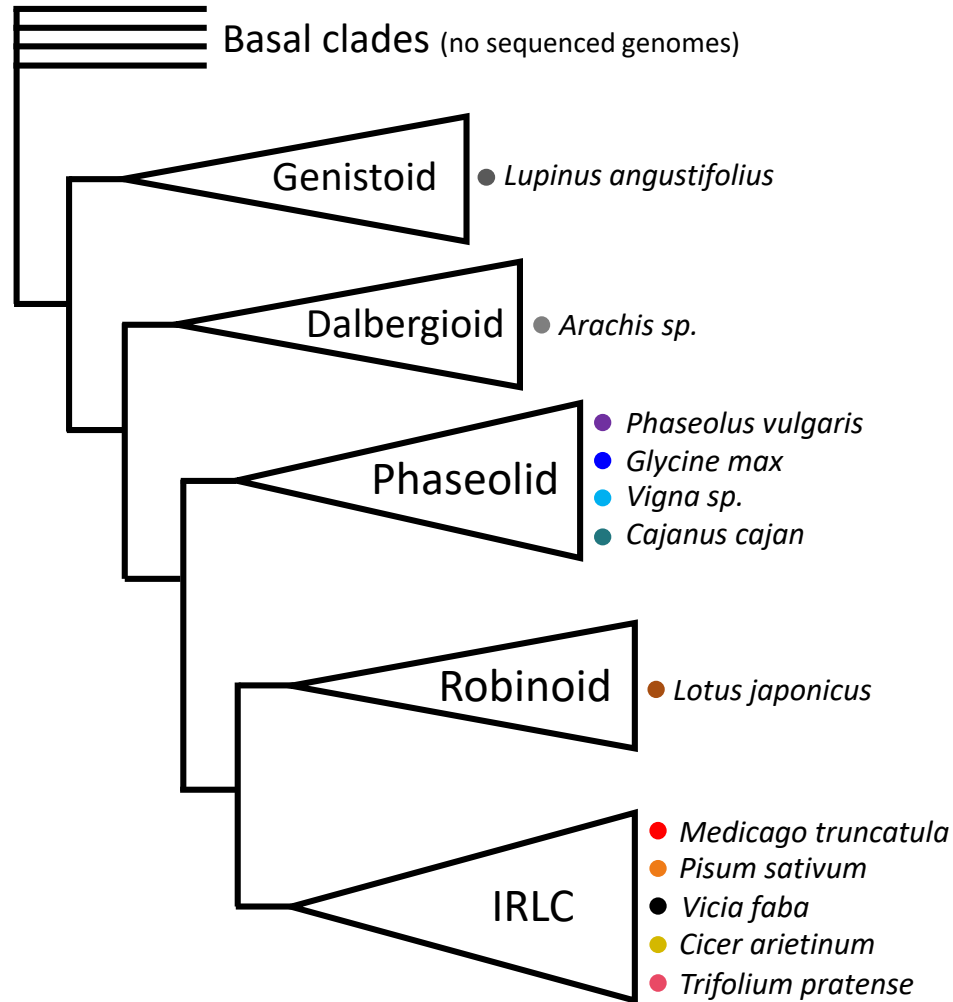

**S1 Fig. Phylogenetic tree of the Papilionoideae subfamily.** The tree is a simplified representation with triangles describing the major clades, including the plastid DNA inverted repeat-lacking clade (IRLC). Adapted from Chantreuil et al. 2016 (<https://doi.org/10.1093/dnares/dsw020>) and The Legume Phylogeny Working Group 2013 (<http://dx.doi.org/10.5167/uzh-78167>).
