# Supplementary material for: Sugar transporters in Fabaceae, featuring SUT MST and SWEET families of the model plant Medicago truncatula and the agricultural crop Pisum sativum
Source: PubMed Central journal article supplement (PMC6768477; doi:10.1371/journal.pone.0223173), 2019-09-30
Supplement: pone.0223173.s002.pdf [file pone.0223173.s002.pdf]

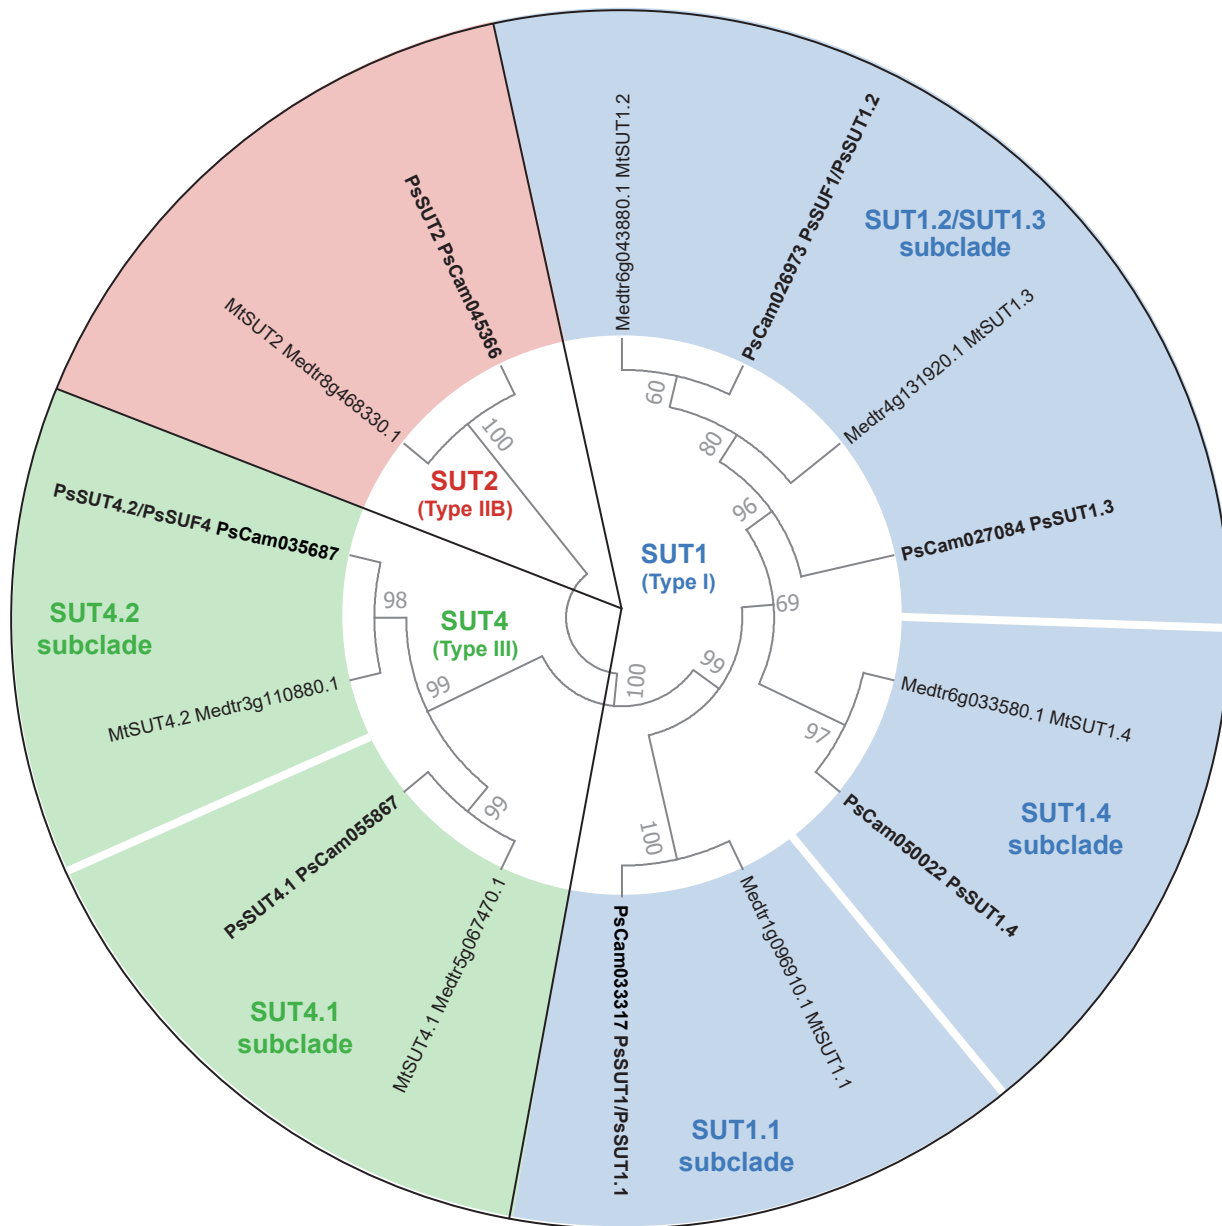

**S2 Fig : Phylogenetic tree of Medicago and pea SUT families.**

The 7 MtSUT (regular font) were retrieved from the *M. truncatula* genome v4.0 and 7 PsSUT (bold font) from the pea Gene Atlas.
