# Supplementary material for: Sugar transporters in Fabaceae, featuring SUT MST and SWEET families of the model plant Medicago truncatula and the agricultural crop Pisum sativum
Source: PubMed Central journal article supplement (PMC6768477; doi:10.1371/journal.pone.0223173), 2019-09-30
Supplement: pone.0223173.s003.pdf [file pone.0223173.s003.pdf]

**PsSUT2 PsCam045366**

**LjSUT2 Lj0g3v0252919**

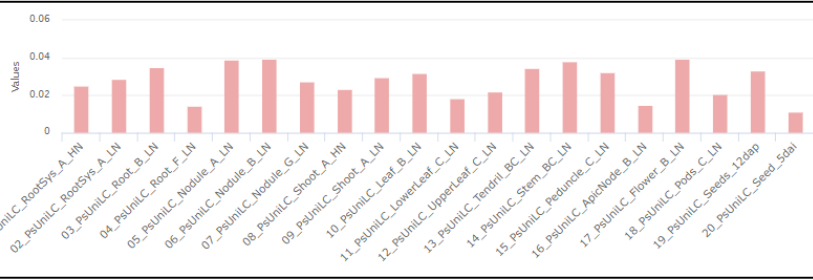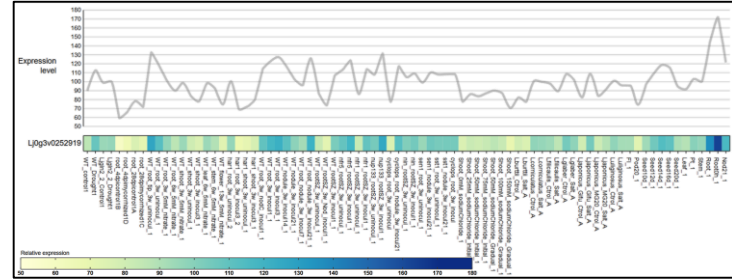

**GmSUT2A Glyma.08G298500**

**GmSUT2B Glyma.18G123400**

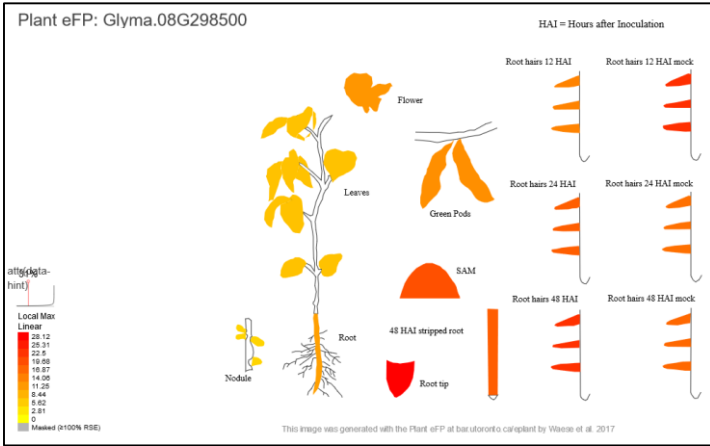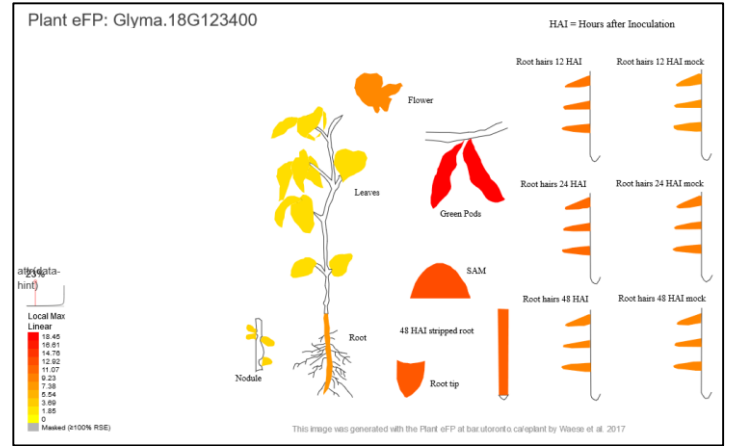

**AtSUC3/AtSUT2 At2g02860**

**ZmSUT2 GRMZM2G145107**

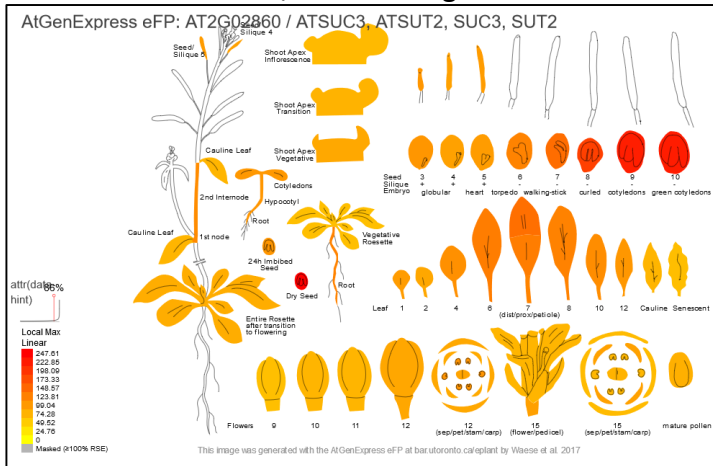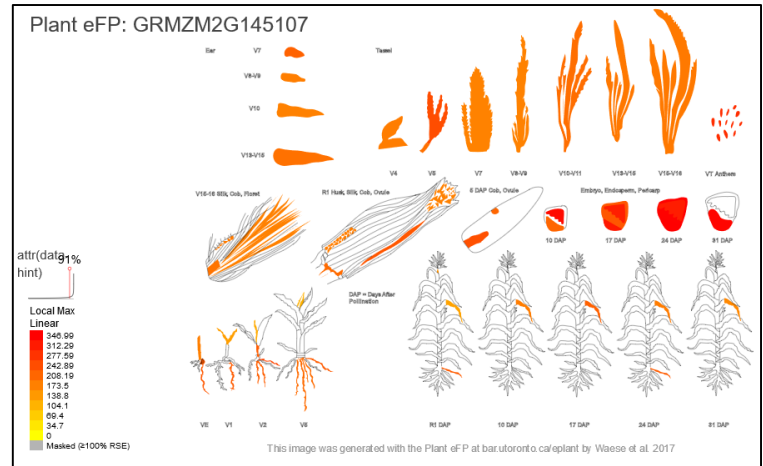

**S3 Fig: SUT2 gene expression patterns.** *Pisum sativum* expression was retrieved from the pea gene atlas, *Lotus japonicus* from ExpAt (<https://lotus.au.dk/expat/>), *Glycine max*, Arabidopsis and *Zea mays* from ePlant (<https://bar.utoronto.ca/eplant/>).
