# Supplementary material for: Sugar transporters in Fabaceae, featuring SUT MST and SWEET families of the model plant Medicago truncatula and the agricultural crop Pisum sativum
Source: PLoS One. 2019 Sep 30;14(9):e0223173. doi: 10.1371/journal.pone.0223173 (PMC6768477; doi:10.1371/journal.pone.0223173)
Supplement: S2 Table — (XLSX) [file pone.0223173.s006.xlsx]

## Sheet: MST clades At Mt Ps
Supplementary Table 2A: Comparative analysis of MST gene clades in Arabidopsis, Medicago truncatula and Pisum sativum. The percentages in brackets (%) show the expansion/reduction of gene number in Medicago genome compared to Arabidopsis within each clade. This percentage is not shown for Pisum sativum as the complete genome is not yet available.
Clades	Arabidopsis	M. truncatula	P. sativum
STP	14	30 (+114%)	21
PLT	6	11 (+83%)	12
TMT	3	5 (+67%)	4
INT	4	9 (+125%)	5
pGlcT/SGB	4	5 (+25%)	6
VGT	3	2 (-33%)	2
ESL	19	10 (-48%)	9
Total MST	53	72	59

## Sheet: SWEET clades At Mt Ps
Supplementary Table 2B: Comparative analysis of SWEET gene clades (top table) and subclades (bottom table) in Arabidopsis, Medicago truncatula and Pisum sativum.
Clades	Arabidopsis	M. truncatula	P. sativum
clade I	3	8	6
clade II	5	7	6
clade III	7	10	9
clade IV	2	1	1
Total SWEET	17	26	22
Subclades	Arabidopsis	M. truncatula	P. sativum
SWEET1	1	2	2
SWEET2	1	3	2
SWEET3	1	3	2
SWEET4/5	2	5	4
SWEET6/7	2	2	2
SWEET8	1	0	0
SWEET9	1	2	1
SWEET10-14	5	4	4
SWEET15	1	4	4
SWEET16/17	2	1	1
